# Supplementary material for: A pilot study to determine the feasibility of enhancing cognitive abilities in children with sensory processing dysfunction
Source: PLoS One. 2017 Apr 5;12(4):e0172616. doi: 10.1371/journal.pone.0172616 (PMC5381761; doi:10.1371/journal.pone.0172616)
Supplement: S1 Dataset — Data from Experiment #1 and #2 presented by group for each test reported. (XLSX) [file pone.0172616.s007.xlsx]

## Sheet: Sheet1
ID	Cohort	Gender	Age	PRE Perceptual Discrimination RT	POST Perceptual Discrimination RT	PRE Perceptual Discrimination RTV	POST Perceptual Discrimination RTV	PRE TOVA RT	POST TOVA RT	PRE TOVA RTV	POST TOVA RTV	PRE EVO RT	POST EVO RT	PRE EVO RTV	POST EVO RTV	PRE MFT	POST MFT	PRE Basic RT	POST Basic RT	PRE Basic RTV	POST Basic RTV	VIQ	PIQ	evo_training_days	evo_diag_sessions	evo_training_sessions	ethnicity	Handedness	PRE Vanderbilt AVG	Post Vanderbilt Avg	FU Vanderbilt Avg	PRE Vanderbilt Cutscore	POST Vanderbilt Cutscore	MFT_Change	Vanderbilt_Change
1	SPD IA	1	10.11	420.27		57.3001		490.939	378.237	229.522	122.448	0.599428	0.52584	0.083972	0.060825	-5.71	1.7134	568.286	634.857	42.3039	195.164	125	135	17	15	97	5	1	18	18	20	1	1		0
2	SPD IA	1	12.9	491.729	482.964	62.4704	87.388					0.773515	0.47775	0.423247	0.073625	-5.17		569.571	527.143	49.3989	37.1659	96	94	27	17	136	1	1	23	22	19	1	1		1
3	SPD IA	2	8.6	446.434	422.701	65.8855	55.7342		442.233		222.219	0.581299	0.513141	0.121691	0.104426			538.571	555.571	26.8046	27.38	130	112	39	15	131	1	1	19	21	9	1	1		-2
4	SPD IA	2	8			57.4838	59.0562	626.774	539.337	223.699		0.850869	0.456881	0.137674	0.042291							96	117	27	8	113	1	1	17	15	9	1	0		2
5	SPD IA	1	9	584.857	516.169			518.871		211.139	219.86		0.517197		0.076875			587.353	571.471	104.808	63.3878	126	115	27	12	112	1	1	21	16	18	1	1		5
6	SPD IA	1	10.5	465.165	430.696	61.0988	52.3825	338.644	365.156	78.4821	113.018	0.525405	0.513941	0.124159	0.079367	-0.31	0.94	450	514.286	60.876	26.4893	99	108	36	17	134	1	1	26	17	17	1	1	1.25	9
7	SPD IA	1	8.5	493.346	419.042	56.9787	51.6815	492.112	427.157	173.294	174.094	0.589091	0.557293	0.143531	0.084034	-1.39	1.94					106	121	29	13	111	5	2	25	13	22	1	0	3.33	12
8	SPD IA	2	11.8	438.589	422.165	43.3985	43.7848	450.311	478.379	145.015	186.113	0.565338	0.500542	0.066684	0.096593	0.73	-0.2	558.571		27.8803		114	110	42	15	130	5	1	25	15		1	1	-0.93	10
9	SPD IA	2	11.3	471.98		31.4596		453.497		174.431		0.520502	0.459218	0.090135	0.071807	1.09		462.857	472.857	36.6679	27.501	126	117				5	1	27			NA	NA
10	SPD IA	2	10	525.706	502.075	50.9468	46.3971	492.138	494.783	135.951	129.532	0.656952	0.510416	0.149101	0.069049	-0.75	1.46					108	98	29	11	118	1	1	20	13	21	1	0	2.21	7
11	SPD IA	1	8.6	560.699	501.608	64.0683	57.1473	505.586	431.322	221.035	202.525	0.792803	0.513971	0.183429	0.071784	-0.52	2.83	397.143	501.571	42.6043	42.9906	126	121	44	7	116	1	1	24	17	15	1	1	3.35	7
12	SPD IA	1	9	538.801				504.739		208.067						-1.46						106	88				1	1	20			NA	NA
13	SPD IA	2	10	559.83	415.184	64.3612	86.4566	537.116		177.508	235.58	0.745844	0.492273	0.121095	0.077094	1.16	0.78					108	119	34	12	122	1	1	22	16	19	1	0	-0.38	6
14	SPD IA	1	9	531.201	385.032	14.4352	54.1714	486.335	391.073	171	107.964	0.650047	0.419308	0.122875	0.036274	0.03	1.17	504.286	482.857	28.1054	40.1154	144	139	35	18	161	1	1	18	11	12	0	0	1.14	7
15	SPD IA	1	8	563.866	528.753	61.9575	53.8618	511.427	545.847	142.359	184.684	0.893784	0.499703	0.248351	0.036799	-0.1	2.55					119	108	34	11	129	5	1	15	14		0	0	2.65	1
16	SPD IA	2	9	650.124	527.121	60.1617	43.382	555.951	445.16	268.889	156.906	0.648586	0.516367	0.111293	0.114964	-1.5	0.24					126	121	22	17	108	5	1	23	15	12	1	0	1.74	8
17	SPD IA	1	9	625.384	464.533	95.6389	57.432	540.313	496.282	200.54	152.893	0.630669	0.521398	0.099825	0.053032	1.34	1.1					104	106	34	17	129	1	1	21		10	1	NA	-0.24
18	SPD IA	1	9	626.621				585.016								0.5		448.571	438.571	34.0538	34.483	100	86				6	1	23			NA	NA
19	SPD IA	1	11	505.272	534.255			510.568		269.305		0.738336		0.135306	0.096933	1.39		655.857	475.714	105.667	33.8062	136	131	28	30	127	1	1	19	24	22	1	1		-5
20	SPD IA	2	11	622.225	464.533	56.9766	57.432	641.754	539.112		163.968	0.681155	0.551966	0.101524	0.063437	1.39	2.2	536.571		47.322		106	79	30	12	125	1	1	20	19	15	1	1	0.81	1
21	TDC	1	11	412.081	342.463	30.0258	44.8999	428.483	345.513	182.028	133.005	0.567634	0.455224	0.074174	0.050803		1	397.143	474.286	42.6043	26.4893	138	117	33	11	150	6	1	8	8	0				0
22	TDC	1	11.9					531.095	443.456	112.217	110.794	0.45408	0.445809	0.091644	0.050374	-0.69	0.89	448.571	440	39.2685	32.5396	130	129	34	19	127	1	1	9	9	9			1.58	0
23	TDC	1	10									0.594593	0.580286	0.090194	0.045879	0.59	1.14					121	104	47	12	149	1	1	1		11			0.55
24	TDC	2	8.2	633.373	499.14	65.5735	65.6752	578.177	507.879	207.487	128.13	0.826968	0.638148	0.137791	0.131269			440	510	35.1468	27.1163	128	123	29	15	117	3	1	4	4	4				0
25	TDC	1	10	410.881		54.086										1.4											1	1	3
26	TDC	2	8.8	583.216		56.6458	48.5837		513.56	226.962	217.132	0.637189	0.469299	0.085778	0.040429				1212.86	90.5399	184.288			40	14	152	1	1	5	6	5				-1
27	TDC	1	11	414.549	416.489	49.4044	56.6772	402.386	404.027	144.07	180.99	0.623271	0.444105	0.117259	0.060016			531.429	553.571	33.0679	24.3616	126	115	25	12	109	6	1	4	5	9				-1
28	TDC	2	8.11	577.829	477.601	58.28	66.2508	539.969	435.586	207.508	101.336	0.680147	0.511524	0.072786	0.049277			524.286	505.714	30.1258	29.1331	121	123	58	7	180	5	1	7	7	11				0
29	TDC	2	10	442.004	440.912	41.3331	57.7141	420.533	415.657	156.475	87.6025	0.569865	0.456282	0.093654	0.062158			495.714	674.429	22.9175	139.752	136	129	35	17	120	1	1	2	3	1				-1
30	TDC	2	11.9	362.855	358.655	52.2346	47.0866	367.938	386.099	113.848	109.333	0.526569	0.425335	0.071357	0.048482	0.99	0.45	487.143	467.143	24.6829	34.6046	114	108	53	17	134	1	1	10	10	3			-0.54	0
31	TDC	1	11.2	465.988	418.508	42.3795	41.1546	440.439	387.982	122.79	109.516	0.500986	0.488237	0.05482	0.055461	-1.64	-0.16	487.143	581.857	39.0001	27.4956	100	90	28	15	156	3	1	11	7	8			1.48	4
32	TDC	2	10.1	406.699	390.16	32.4227	27.0297	382.573	400.719	86.6149	121.558	0.553031	0.448578	0.081935	0.050504	1.98	3.02	441.429	432.857	30.8834	35.4444	124	117	43	9	97	1	1	10	6	6			1.04	4
33	TDC	2	10.1	399.402	362.62	33.0849	33.7409	384.837	326.125	76.7953	60.3753	0.503754	0.378655	0.064673	0.067364	0.66	-0.91	517.143	559.571	30.5413	53.5967	112	102	33	11	114	1	1	5	1	1			-1.57	4
34	TDC	1	11.6	411.5	409.863	48.6797	41.5597	397.921	330.215	87.8381	48.3601	0.537526	0.407191	0.099358	0.046166	1.06	1.72	434.286	474.286	34.2384	17.0269	126	119	39	15	180	1	1	8	6	0			0.66	2
35	TDC	1	9.11	445.595	451.678	44.4807	65.7786	424.859	445.719	131.182	124.117	0.515684	0.4252	0.086913	0.043703	1.22	1.49	501.429	465.714	29.9158	22.9175	114	121	36	15	141	1	1	10	9	8			0.27	1
36	TDC	2	11	413.622	409.385	36.833	29.6319	373.039	377.221	86.4135	92.2685	0.525516	0.441127	0.094735	0.055908	1.62	0	577.286	490	74.4326	24.2536	136	129	31	17	116	1	1	6	8	7			-1.62	-2
37	TDC	1	10.1	463.309	438.909	78.7046	70.3348	452.399	388.452	130.33	90.8686	0.632061	0.459123	0.105249	0.040844	0.83	0.64	534.571	457.143	117.663	41.2005	119	94	29	16	130	2	2	9	8	3			-0.19	1
38	TDC	1	10.6	367.194	364.924		9.2376	331.217	296.513	134.255	110.406	0.565377	0.448185	0.104611		1.54	0.87	434.286	404.286	49.958	44.0111	116	117	27	15	140	5	1	4	6	6			-0.67	-2
39	TDC	2	12.8	387.473		37.0751				71.2892						1.97		458.571	451.429	32.2803	34.9068	121	112				6	1	0
40	TDC	1	10.1	449.019	409.313	34.2836	53.808	377.041	414.172	127.553	152.936	0.560188	0.456875	0.083856	0.075264	2.69						134	110	42	16	127	1	1	7	5	3				2
41	TDC	2	12	436.584	428.619	43.5863	52.312	450.064	417.669	151.279	158.866	0.648592	0.461564	0.10132	0.061219	-0.36	0.29					134	127	37	17	135	1	1	2	1				0.65	1
42	TDC	1	12.8	509.245		26.2786		390.48		118.879						-1.24		470		20.292		110	115				6	1	0
43	TDC	2	11.3	454.178	413.4	32.9471	43.0339	444.042	458.795	94.7885	190.88	0.506996	0.430144	0.07149	0.053934	2.92	2.56	803.286	674.429	179.025	139.752	114	106	29	16	107	2	1	3	5	3			-0.36	-2
44	TDC	2	8.1	574.175	508.047	38.8453	70.978	534.71	374.188	151.065	78.2065	0.656467	0.461623	0.11261	0.043439	1.5	0.94	538.571	532.857	33.1789	31.9532	128	125	35	15	139	6	1	1		2			-0.56
45	TDC	1	10.8	499.829	444.191	51.3077	67.4517	509.537	444.268	229.823	134.663	0.648442	0.485826	0.086872	0.051069	1.1	1.02	518.571	701.429	34.0538	117.126	146	121	36	18	136	1	1	2	1	0			-0.08	1
46	SPD	1	11	481.028	487.101	66.9058	61.2186	515.357	370.468	169.037	105.854	0.611428	0.506301	0.146409	0.063442			534.571	472.857	36.4686	35.027	124	127	28	12	102	1	1	13	16	12				-3
47	SPD	2	10															451.429		36.5532		95	98				5	1	8
48	SPD	2	8							185.711								487.143		24.6829		83	84				1	1	9
49	SPD	2	12.2					345.012	301.654	111.21	74.4517	0.484029	0.418484	0.071906	0.038655	-0.22	0.64	485.714	531.429	32.4749	25.6839	144	102	40	14	134	1	1	11	6	6			0.86	5
50	SPD	2	8.9	608.847		66.46		481.08		145.173		0.603003	0.575818	0.19092	0.063914							130	127				1	1	13
51	SPD	2	9.3	578.923		60.1008		454.007		224.27		0.700832	0.465162	0.093667	0.055565							114	98				1	1	8
52	SPD	1	11.8	400.02	440.498	47.081	54.6147	304.52	340.926	70.93		0.440981	0.490298	0.071427	0.082627	0.37	0.11	445.714	418.571	31.0868	40.0105	138	131	28	14	132	1	1	13	10				-0.26	3
53	SPD	1	12.5	420.546	457.442	49.8892	42.1401	363.396	446.067	91.6617	148.007	0.513653	0.431958	0.066341	0.038059	-0.19	0.65	475.714	474.286	27.0387	20.1882	100	98	29	7	162	5	1	12	8	11			0.84	4
54	SPD	1	9.6	446.819	425.383	39.1588	54.8393	350.865	373.445	86.5577	102.964	0.532708	0.51639	0.074184	0.068076	0.37	-0.34	440		45.3743		112	102	27	16	142	5	1	14	12	7			-0.71	2
55	SPD	1	11.9	422.425	411.28	55.5596	58.0004	369.401	406.1	121.442	133.227	0.505382	0.421673	0.104513	0.071295	0.22	0.75	484.286	762.381		144.876	119	123	30	12	60	5	1	15	20	15			0.53	-5
56	SPD	1	8.9	434.713	422.12	56.0929	62.9355	454.785	343.017	150.737	108.901	0.684418	0.473917	0.108391	0.047885	-0.08	-0.87	531.429	687.353		116.995	100	119	29	16	122	5	2	12	10	9			-0.79	2
57	SPD	1	11.2	568.631	439.575	52.3951	47.4011	452.957	420.552	113.835	130.454	0.833467	0.563723	0.222807	0.079316	-0.63		591.286	588.857	46.0074	43.1496	126	104	32	21	122	1	1	18	15	11				3
58	SPD	2	9.1	445.264	453.669	56.9893	56.97	420.931	397.984	183.27	105.741	0.611581	0.430656	0.135358	0.048252	0.92	-1.14					132	106	35	17	112	5	1	15	16	10			-2.06	-1
59	SPD	2	12.2	407.992		48.1422		357.51		110.822		0.612012		0.141106	0.0722	2.03						114	104				1	1	8
60	SPD	1	11	435.858		48.7786		411.761		115.449						-0.6		414.5		54.6255		119	135				1	1	2
61	SPD	1	8.7	590.458	499.327	39.7142	49.9844	619.81	504.143	210.868	184.139	0.72333	0.446681	0.147171		1.05	0.34	559.286	437.143	85.4241	46.8773	121	129	29	15	128	1	1	12	14				-0.71	-2
62	SPD	2	9			68.5329		617.695		189.899						-2.52						121	88				1	1	11
